# Supplementary material for: A Custom Genotyping Array Reveals Population-Level Heterogeneity for the Genetic Risks of Prostate Cancer and Other Cancers in Africa
Source: Oxford University Press journal article supplement (doi:10.1158/0008-5472.can-19-2165), 2020-05-11
Supplement: 00085472can192165-sup-225634_3_supp_6277899_q9v6hk.xlsx [file 00085472can192165-sup-225634_3_supp_6277899_q9v6hk.xlsx]

## Sheet: Description of Table S2
Table S2. QC thresholds, genotyping metrics, and statistical tests.
This .xlsx file lists Axiom genotyping solution QC thresholds.
Genotyping metrics for both pegs of the MADCaP Array are listed here.
This file also includes Benjamini-Hochberg adjusted p-values (FDR = 5%) for pairwise comparisons of derived allele frequencies, ancestry proportions of cases and controls, cumulative runs of homozygosity, and PRS distributions.

## Sheet: Axiom QC thresholds
Sample QC Thresholds
DQC:	≥ 0.82
QC call_rate:	≥ 97
Percent of passing samples:	≥ 95
Average call rate for passing samples:	≥ 98.5
SNP QC Thresholds
species-type:	Human
cr-cutoff:	≥ 95
fld-cutoff:	≥ 3.6
het-so-cutoff:	≥ -0.1
het-so-XChr-cutoff:	≥ -0.1
het-so-otv-cutoff:	≥ -0.3
hom-ro-1-cutoff:	≥ 0.6
hom-ro-2-cutoff:	≥ 0.3
hom-ro-3-cutoff:	≥ -0.9
hom-ro:	true
hom-het:	true
num-minor-allele-cutoff:	≥ 2
hom-ro-hap-1-XChr-cutoff:	≥ 0.1
hom-ro-hap-1-MTChr-cutoff:	≥ 0.4
hom-ro-hap-2-XChr-cutoff:	≥ 0.05
hom-ro-hap-2-MTChr-cutoff:	≥ 0.2
aaf-XChr-cut:	< 0.36
fld-XChr-cut:	≥ 4
homfld-XChr-cut:	≥ 6.5
homfld-YChr-cut:	≥ 6.5
min-YChr-samples-cut:	≥ 5
sign-diff-hom-1-cutoff:	≥ 0.5
sign-diff-hom-2-cutoff:	≥ 0.4
min-mean-cp2-cutoff:	≥ 9
max-mean-cp2-cutoff:	≤ 15
priority-order:	PolyHighResolution, NoMinorHom, OTV, MonoHighResolution, CallRateBelowThreshold
recommended:	PolyHighResolution, NoMinorHom, MonoHighResolution, Hemizygous
y-restrict:	≤ 0.2
Axiom genotyping solution QC thresholds used in this study are listed above

## Sheet: Genotyping metrics for each peg
Genotyping metric	Peg 1	Peg 2
Mean call rate (proportion markers called)	0.9955	0.9963
Mean reproducibility (same calls for each probe)	0.9985	0.999
Mean concordance (same calls in replicates)	0.9953	0.9956
Error rate (Mendelian inconsistencies)	0.00051	0.00032
Genotyping metrics for peg 1 and peg 2 of the MADCaP Array are shown here

## Sheet: DAF array comparisons
MADCaP Array										Technology	Population	Median DAF	Mean DAF
		AFR	AMR	EAS	EUR	SAS				MADCaP Array	AFR	0.0809	0.2014
	AFR		< 2.20E-16	< 2.20E-16	< 2.20E-16	< 2.20E-16					AMR	0.0303	0.2023
	AMR			< 2.20E-16	< 2.20E-16	< 2.20E-16					EAS	0.003	0.2016
	EAS				< 2.20E-16	< 2.20E-16					EUR	0.0258	0.2027
	EUR					< 2.20E-16					SAS	0.0266	0.2017
	SAS
										Infinium OncoArray	AFR	0.1755	0.256
											AMR	0.2046	0.2928
Infinium OncoArray											EAS	0.1925	0.2942
		AFR	AMR	EAS	EUR	SAS					EUR	0.2078	0.2973
	AFR		2.75e-16	1.43e-09	2.75e-16	2.75e-16					SAS	0.2065	0.2923
	AMR			2.75e-16	0.000404	2.75e-16
	EAS				2.75e-16	2.75e-16				H3Africa Array	AFR	0.149	0.2566
	EUR					2.75e-16					AMR	0.134	0.2668
	SAS										EAS	0.1116	0.2672
											EUR	0.1312	0.2679
											SAS	0.137	0.2669
H3Africa Array		AFR	AMR	EAS	EUR	SAS
	AFR		2.2e-16	2.2e-16	2.2e-16	2.2e-16
	AMR			2.2e-16	2.2e-16	2.2e-16
	EAS				2.2e-16	2.2e-16
	EUR					2.2e-16
	SAS
Array-specific pairwise comparisons of derived allele frequencies (continental populations from the 1000 Genomes Project)
Wilcoxon rank-sum tests were used to compare DAF distributions.
Benjamini-Hochberg corrections (FDR = 0.05, 10 tests for 3 different arrays) were used to generate the adjusted p-values shown here.
Adjusted p-values shown here are for the data in Figure 2B.
The low p-values observed here arise because 450,000 markers per array were analyzed for each pairwise population comparison.

## Sheet: ADMIXTURE cases vs. controls
	Gold ancestry color	Green ancestry color	Blue ancestry color
HOGGY	0.2903	0.4107	0.9819
37 Military	0.1076	0.228	0.6825
KBTH	0.4375	0.9365	0.2096
UCH	0.7161	0.727	0.6478
UATH	0.7369	0.4818	0.9108
WITS	0.9305	0.28	0.605
SU	0.5489	0.3265	0.8156
Pairwise case/control comparision of ancestry proportion without corrections for multiple tests
Wilcoxin rank-sum test were used to compare distributions of ancestry proportions.
Un-adjusted p-values are shown above.
	Gold ancestry color	Green ancestry color	Blue ancestry color
HOGGY	0.859717	0.67452	0.9818
37 Military	0.7532	0.67452	0.9818
KBTH	0.859717	0.9365	0.9818
UCH	0.859717	0.848167	0.9818
UATH	0.859717	0.67452	0.9818
WITS	0.9305	0.67452	0.9818
SU	0.859717	0.67452	0.9818
Pairwise case/control comparisson of ancestry proportion with corrections for multiple tests
Benjamin-Hochberg corrections (FDR = 0.05, 7 case-control comparisons for 3 ancestry colors) were used to generate the adjusted p-vlaues shown here.
Adjusted p-values shown here are for the data in Figure 3C (ADMIXTURE plots with k = 3).

## Sheet: cROH study site comparisons
	HOGGY	37 Military	KBTH	UCH	UATH	WITS	SU
HOGGY		0.366625	0.727767	0.993	0.5768	0.0104265	0.0131796
37 Military			0.52305	0.268227	0.692506	0.0003486	0.000373695
KBTH				0.692506	0.785289	0.00118902	0.00165095
UCH					0.486877	0.0104265	0.0122617
UATH						0.000464993	0.000464993
WITS							0.993
SU
Pairwise comparisons of cumulative runs of homozygosity (cROH) for MADCaP study sites
Wilcoxon rank-sum tests were used to compare cROH distributions.
Benjamini-Hochberg corrections (FDR = 0.05, 21 total tests) were used to generate the adjusted p-values shown here.
Adjusted p-values shown here are for the data in Figure 4A.

## Sheet: PRS study site comparisons
	HOGGY	37 Military	KBTH	UCH	UATH	WITS	SU	EUR
HOGGY		0.0687939	0.364609	0.032508	0.0011375	0.357516	0.364609	1.7e-06
37 Military			0.357516	0.816928	0.323153	0.418473	0.364609	7.196e-11
KBTH				0.2942	0.03248	0.88708	0.887	1.4224e-08
UCH					0.364609	0.323153	0.323153	2.296e-12
UATH						0.0431667	0.0370109	6.16e-15
WITS							0.876193	2.639e-09
SU								1.48867e-08
EUR
Pairwise comparisons of polygenic risk scores (PRS) for MADCaP study sites and European data from the 1000 Genomes Project
Wilcoxon rank-sum tests were used to compare PRS distributions.
Benjamini-Hochberg corrections (FDR = 0.05, 28 total tests) were used to generate the adjusted p-values shown here.
Adjusted p-values shown here are for the data in Figure 6.
